# Supplementary material for: IFT proteins interact with HSET to promote supernumerary centrosome clustering in mitosis
Source: PubMed Central journal article supplement (PMC7271317; doi:10.15252/embr.201949234), 2020-04-09

# Source data Figure 3

## Figure 3B

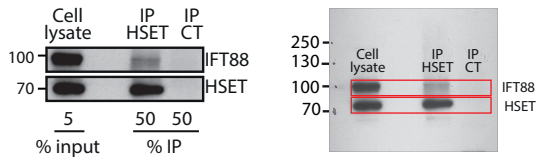

## Figure 3D

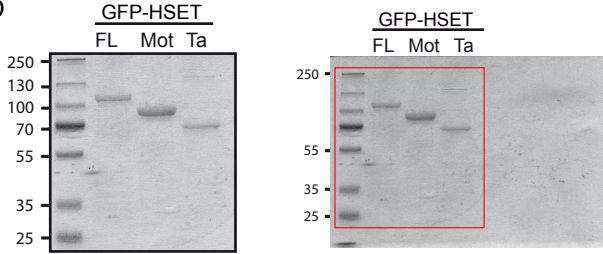

## Figure 3E

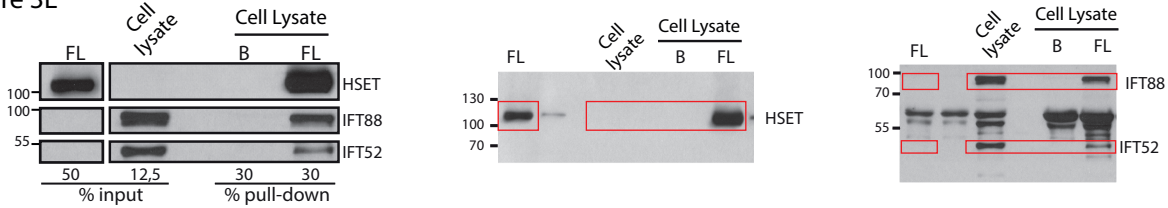

## Figure 3F

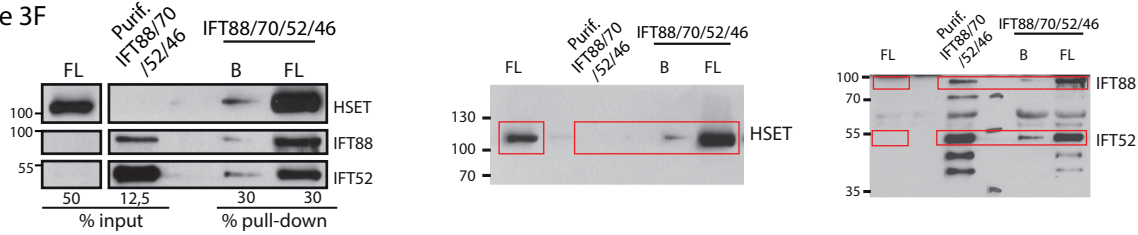

## Figure 3G

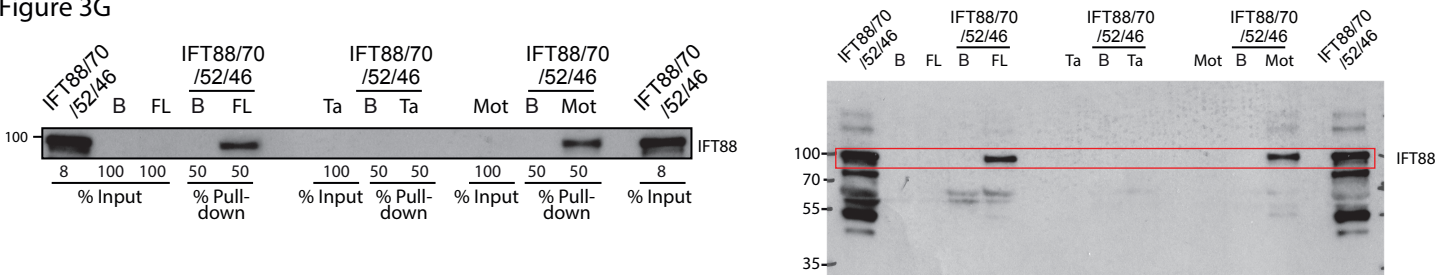

## Figure 3H

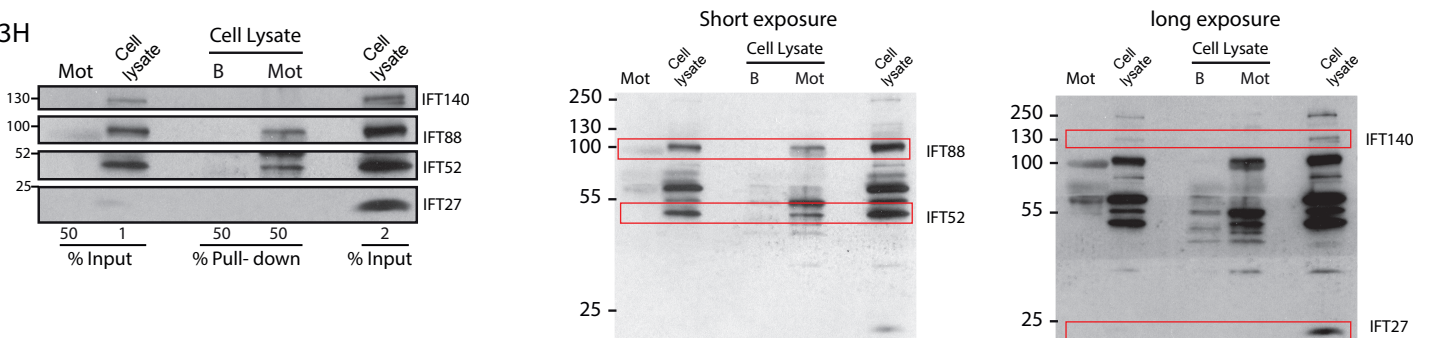

Supplement: EMBR-21-e49234-s011.pdf [file EMBR-21-e49234-s011.pdf]
