# Supplementary material for: IFT proteins interact with HSET to promote supernumerary centrosome clustering in mitosis
Source: PubMed Central journal article supplement (PMC7271317; doi:10.15252/embr.201949234), 2020-04-09

# Source data Figure 5

## Source data Figure 5C

Figure 5C

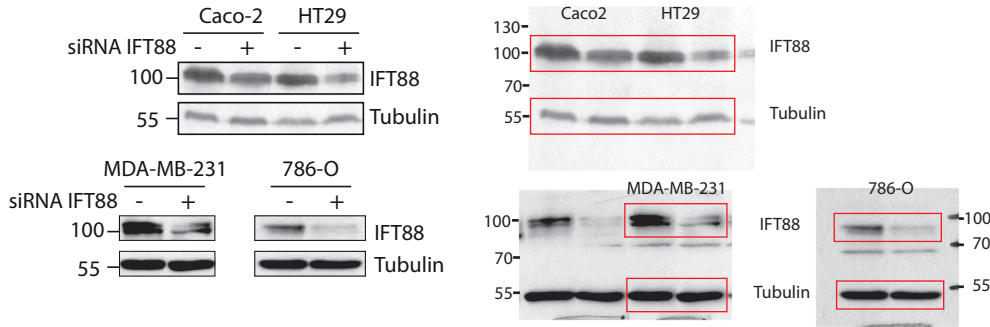

Figure 5I

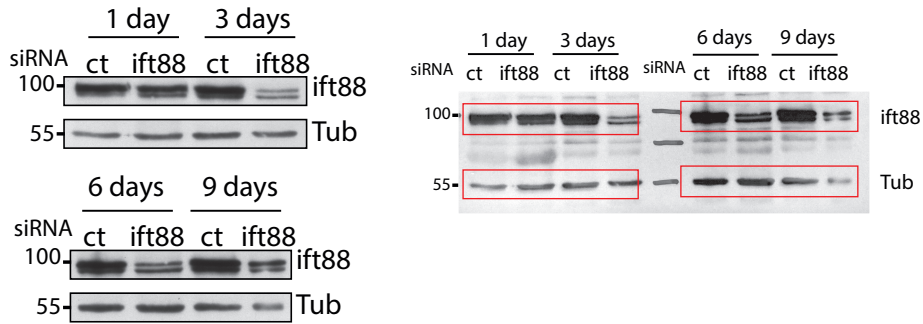

Supplement: EMBR-21-e49234-s012.pdf [file EMBR-21-e49234-s012.pdf]
